# Supplementary material for: Neoadjuvant Therapy Remodels the Pancreatic Cancer Microenvironment via Depletion of Protumorigenic Immune Cells
Source: Oxford University Press journal article supplement (doi:10.1158/1078-0432.ccr-19-1864), 2019-10-04
Supplement: 10780432ccr191864-sup-223640_2_supp_5761947_pyg65q.docx [file 10780432ccr191864-sup-223640_2_supp_5761947_pyg65q.docx]

|  | Primary resected  (n=37) | NeoTx  (n=37) | *p* value |
| --- | --- | --- | --- |
| Sex  Male  Female | 21 (58.3%)  16 (41.6%) | 20 (54.1%)  17 (45.9%) | 0.818 |
| Age (year) | 63.5 (46-82) | 62.6 (47-78) | 0.654 |
| Tumorsize (mm) | 41.5 (3-90) | 37.6 (15-100) | 0.401 |
| T Status  T1-T2  T3-T4 | 15 (41.6%)  21 (58.3%) | 20 (54.1%)  17 (45.9%) | 0.636 |
| N Status  N0  N1 | 11 (29.8%)  26 (72.2%) | 19 (51.4%)  18 (48.6%) | 0.059 |
| M Status  M0  M1 | 31 (83.7%)  6 (16.3%) | 31 (83.7%)  6 (16.3%) | 1.000 |
| Grading  G1  G2  G3 | 2 (5.4%)  18 (48.6%)  17 (46.0%) | 0 (0%)  15 (45.4%)  18 (54.6%) | 0.297 |
| Resection Status  R0  R1  R2 | 18 (54.5%)  14 (42.4%)  1 (3.1%) | 12 (38.8%)  19 (61.2%)  0 (0%) | 0.340 |
| Tumor Localisation  Head  Corpus  Tail  Head-corpus  Corpus-Tail | 23 (62.2%)  10 (27.0%)  2 (5.4%)  1 (2.7%)  1 (2.7%) | 26 (70.2%)  5 (13.6%)  3 (8.1%)  2 (5.4%)  1 (2.7%) | 1.000 |
| Surgical operation  Pancreatic head resection  Distal pancreatectomy  Total pancreatectomy | 21 (56.7%)  11 (29.7%)  5 (13.5%) | 24 (64.9%)  8 (21.6%)  5 (13.5%) | 0.634 |
| Clinical manifestations  Abdominal pain  Jaundice  Weight loss  New onset diabetes mellitus | 13 (38.2%)  15 (44.1%)  9 (26.5%)  3 (8.3%) | 17 (65.4%)  6 (23%)  6 (23%)  2 (5.4%) | 0.038  0.093  0.768  0.626 |

| NeoCTx regime | N° of patients (n=37) |
| --- | --- |
| Gemcitabine mono | 6 (16%) |
| Gemcitabine + Erlotinib | 5 (14%) |
| Gemcitabine + Oxaliplatin | 8 (22%) |
| Folfirinox | 13 (34%) |
| Other regimes (e.g. radiotherapy) | 5 (14%) |

**Supplementary Table 1. Clinical characteristics of neoadjuvantly treated vs upfront resected PDAC patients and the types of neoadjuvant regimens.** NeoTx: neoadjuvant treatment

| Antibody | Catalog Number | Species | Type | Dilution | Company |
| --- | --- | --- | --- | --- | --- |
| Anti-αSMA | M0851 | mouse | monoclonal | 1:2000 | DAKO, Hamburg, Germany |
| Anti-S100 | MAB079-1 | mouse | monoclonal | 1:200 | Milipore, Massachusetts, U.S.A |
| Anti-CK19 | sc25724 | rabbit | polyclonal | 1:100 | Santa Cruz, Texas, U.S.A |
| Anti-CD31 | ab-28364 | rabbit | polyclonal | 1:400 | Abcam, Cambridge, UK |
| Anti-CD45 | DB042-1 | rabbit | polyclonal | 1:400 | DB Biotech, Kosice, Slovakia |
| Anti-CD8 | Mob117 | mouse | monoclonal | 1:40 | Diagnostic Biosystems |
| Anti-ITGAE | HPA036313 | rabbit | polyclonal | 1:20 | Sigma, Missouri, U.S.A. |
| Anti-FOXP3 | ab20034 | mouse | monoclonal | 1:100 | Abcam, Cambridge, UK |
| Anti-CD4 | HPA004252 | rabbit | polyclonal | 1:80 | Sigma Prestige, Missouri, U.S.A. |
| Anti-CD33 | SAB4700737 | mouse | monoclonal | 1:100 | Sigma Aldrich, Missouri, U.S.A. |
| Anti-CD11 | Ab52478 | rabbit | polyclonal | 1:100 | Abcam, Cambridge, UK |
| Anti-CD56 | AB5032 | rabbit | polyclonal | 1:600 | Millipore, Massachusetts, U.S.A |
| Anti-CD68 | HPA048982 | rabbit | polyclonal | 1:200 | Sigma, Missouri, U.S.A. |
| Anti-CD68 | Mob167 | mouse | monoclonal | 1:200 | DBiosystems, California, U.S.A. |
| Anti-HLA-DR | sc-56545 | mouse | monoclonal | 1:200 | Santa Cruz, Texas, U.S.A. |
| Anti-MRC1 | HPA004114 | rabbit | polyclonal | 1:200 | Sigma, Missouri, U.S.A. |
| Anti-CD20 | NCL-L-CD20-L26 | mouse | monoclonal | 1:200 | Leica, Wetzlar, Germany |

**Supplementary Table 2. Specifications and dilutions of the primary antibodies used in our experimental pipeline**

|  | Histological feature | Formula |
| --- | --- | --- |
| Desmoplastic reaction | Collagen ratio | Collagen area (µm2)/total area (µm2) |
| αSMA ratio | αSMA area (µm2)/ total area (µm2) |
| Activated stroma Index (ASI) | αSMA area (µm2)/collagen area (µm2) |
| Angiogenesis | Endothelial area (EA) | CD31 area (µm2)/ total area (µm2) |
| Microvessel lumen area (MLA) | Microvessel lumen (µm2) area/ total area (µm2) |
| Neurogenesis | Neural density | N° of nerves/ total area (µm2) |
| Neural area (%) | Area of nervesx100 (µm2)/ total area (µm2) |
| Neural hypertrophy (µm2) | Area of nerves (µm2)/ total N° of nerves |
| Neural Invasion | Perineural invasion (PNI) index | N° of nerves with PNI/ total N° of nerves |
| Endoneural invasion (ENI) index | N° of nerves with ENI/ total N° of nerves |
| Neural invasion (NI) index | 2x N° of nerves with ENI + N° of nerves with PNI/ total N° of nerves |

**Supplementary Table 3. Histopathological variables used in the analysis of the PCa stroma**

|  | Median survival (mo) | p value univariate | p value multivariate | Hazard ratio (95% CI) |
| --- | --- | --- | --- | --- |
| Nodal status (N0/N1) | 24.0/14.0 | 0.0793 | 0.001 | 0.618 (0.361-1.058) |
| Surgical margins (R0/R1-2) | 24.0/14.5 | 0.0232 | 0.023 | 0.537 (0.314-0.918) |
| Differentiation (G1-2/G3) | 28.0/14.0 | 0.0316 | 0.032 | 0.552 (0.322-0.949) |
| ASI | 24.5/13.0 | 0.0157 | 0.027 | 0.488 (0.273-0.873) |
| NI index | 24.0/13.0 | 0.0392 | 0.732 | 0.488 (0.247-0.965) |
| CD4+ T cell density | 16.0/23.0 | 0.0475 | 0.052 | 1.989 (1.008-3.927) |
| CD56+ NK cells | 24.0/13.5 | 0.0514 | 0.038 | 0.591 (0.340-1.025) |

**Supplementary Table 4. Univariate and multivariate survival analysis for prognostically relevant clinical and histological features.**  Lymph node status, surgical margins and grade of differentiation were divided into negative and positive groups, while the infiltration with immune cells were divided into low and high groups using the median as cut-off value for ASI, DCs and NK cells, the 25 percentile for CD4+ T cells and the 75 percentile for NI as they appeared to predict more accurately the tumoral behaviour. We used the log-rank test for the univariate analysis and the calculation of the hazard ratio and a Cox regression for the multivariate analysis. CI: confidence interval.

|  | NeoTx | | Primary resected | | Figure | | |
| --- | --- | --- | --- | --- | --- | --- | --- |
| Inflammation |  |  | | | | 1 | |
| Leukocytes | |  | |  | | | 1 |
| CD8+ Cytotoxic T cells | |  | |  | | | 1 |
| CD103+ CD8+ Dendritic cells | |  | |  | | | 1 |
| CD68+ macrophages | |  | |  | | | 1 |
| HLA-DR+CD68+ M1 macrophages | |  | |  | | | 1 |
| CD206+CD68+ M2 macrophages | |  | |  | | | 2 |
| CD4+ T helper cell density | |  | |  | | | 2 |
| Foxp3+CD4+ Treg | |  | |  | | | 2 |
| CD56+ NK cells | |  | |  | | | 2 |
| CD20+ B lymphocytes | |  | |  | | | 2 |
| CD33+CD11+ MDSC | |  | |  | | | 2 |
| Proportion CD8+ to MDSC | |  | |  | | | 3 |
| Tumor index  (%vital tumor cells) |  |  | | | | 3 | |
| Ki67+ tumor cells |  |  | | | | 5 | |
| Neural invasion index |  |  | | | | 5 | |
| Angiogenesis |  |  | | | | 4 | |
| Stromal activity |  |  | | | | 4 | |
| aSMA+ area |  |  | | | | 4 | |
| Collagen+ area |  |  | | | | 4 | |
| Activated stroma index |  |  | | | | 4 | |

**Supplementary Table 5. Summary of the histopathology results in the comparison of pancreatic cancer (PCa) tissues after neoadjuvant therapy (neoTx) vs. after primary resection.** Indicates lower amount, indicates higher amount,

stands for no significant difference in amount.

| NeoCTx regime | N° of patients (n=37) |
| --- | --- |
| Gemcitabine mono | 6 (16%) |
| Gemcitabine + Erlotinib | 5 (14%) |
| Gemcitabine + Oxaliplatin | 8 (22%) |
| Folfirinox | 13 (34%) |
| Other regimes (e.g. radiotherapy) | 5 (14%) |

**Supplementary Table 6. Neoadjuvant therapy regimes**
